# Supplementary material
Source: publisher figshare collection journal article supplement (https://tandf.figshare.com/ndownloader/files/34143892)
Supplement: Supplementary file 1 [file 34143892]

**Supplemental figure title and legend**

**Supplemental Figure 1. Patient inclusion.**

Abbreviations: GI = Gastrointestinal.
a Reasons geriatric screening not performed: Palliative treatment intent n=19 (43.2%), staff shortage n=23 (52.3%), geriatric screening or assessment at referring hospital n=1 (2.3%), patient refused n=1 (2.3%).
